# Supplementary material
Source: publisher figshare collection journal article supplement (https://karger.figshare.com/ndownloader/files/21385164)
Supplement: Supplementary file 1 [file 21385164]

## Supplementary Tables

**Supplementary Table S1.** Comparison of the 18,507 included patients and the 2,840 excluded patients

| Variables                             | Excluded<br>(n = 2,840) | Included<br>(n = 18,507) | Standardized<br>difference |
|---------------------------------------|-------------------------|--------------------------|----------------------------|
| Age                                   | 54 ± 15                 | 56 ± 15                  | -0.10                      |
| Female                                | 43%                     | 43%                      | 0.01                       |
| Charlson                              | 5 ± 2                   | 5 ± 2                    | -0.05                      |
| Dialysis duration (days)              | 405 (228-708)           | 43 (15-144)              | 1.83                       |
| Race                                  |                         |                          |                            |
| Asian                                 | 4%                      | 4%                       | -0.01                      |
| African-American                      | 22%                     | 23%                      | -0.02                      |
| White                                 | 62%                     | 58%                      | 0.08                       |
| Hispanic                              | 9%                      | 12%                      | -0.09                      |
| Other races                           | 3%                      | 3%                       | -0.01                      |
| Primary insurance                     |                         |                          |                            |
| Medicare                              | 56%                     | 44%                      | 0.24                       |
| Medicaid                              | 4%                      | 4%                       | -0.02                      |
| Other                                 | 40%                     | 51%                      | -0.23                      |
| ESRD reason                           |                         |                          |                            |
| DM                                    | 37%                     | 40%                      | -0.06                      |
| HTN                                   | 24%                     | 27%                      | -0.07                      |
| GN                                    | 19%                     | 16%                      | 0.08                       |
| PCKD                                  | 5%                      | 4%                       | 0.02                       |
| Other                                 | 17%                     | 14%                      | 0.08                       |
| Comorbidities                         |                         |                          |                            |
| Diabetes                              | 56%                     | 63%                      | -0.13                      |
| Hypertension                          | 61%                     | 54%                      | 0.14                       |
| Atherosclerotic heart disease         | 18%                     | 18%                      | 0.01                       |
| Congestive heart failure              | 25%                     | 23%                      | 0.04                       |
| Cerebrovascular disease               | 1%                      | 1%                       | 0.02                       |
| Other cardiovascular disease          | 18%                     | 15%                      | 0.07                       |
| Chronic obstructive pulmonary disease | 5%                      | 4%                       | 0.05                       |
| Dyslipidemia                          | 45%                     | 45%                      | 0.01                       |
| Liver disease                         | 1%                      | 1%                       | -0.02                      |
| Alcohol abuse                         | 0%                      | 0%                       | 0.02                       |
| History of cancer                     | 3%                      | 2%                       | 0.04                       |
| Prior transplant                      | 4%                      | 3%                       | 0.07                       |
| Body mass index (kg/m <sup>2</sup> )  | 27 (24-33)              | 27 (24-32)               | 0.04                       |
| Laboratory results                    |                         |                          |                            |
| Albumin (g/dL)                        | 3.8 ± 0.5               | 3.7 ± 0.5                | 0.13                       |
| Creatinine (mg/dL)                    | 8.3 ± 3.7               | 6.8 ± 3.1                | 0.45                       |

ESRD, end-stage renal disease; DM, diabetes mellitus; HTN, hypertension; GN, glomerulonephritis; PCKD, polycystic kidney disease.

**Supplementary Table S2.** Comparison between incident unmatched and matched home dialysis patients (2007-2011)

| Variables                    | HHD<br>(n = 1,993) | PD<br>(n = 16,514) | SD    | HHD<br>(n = 1,915) | PD<br>(n = 1,915) | SD    |
|------------------------------|--------------------|--------------------|-------|--------------------|-------------------|-------|
| Age                          | 53 ± 15            | 56 ± 16            | -0.18 | 54 ± 15            | 54 ± 15           | -0.01 |
| Female                       | 34%                | 44%                | -0.20 | 35%                | 36%               | -0.02 |
| Charlson                     | 4.6 ± 2.1          | 4.8 ± 2.0          | 0.88  | 4.7 ± 2.1          | 4.7 ± 2.1         | -0.07 |
| Dialysis duration (days)     | 195 (58–430)       | 37 (13–118)        | 0.14  | 190 (57–421)       | 158 (55–435)      | 0.05  |
| Race                         |                    |                    |       |                    |                   |       |
| Asian                        | 3%                 | 4%                 | -0.06 | 3%                 | 3%                | 0.01  |
| African-American             | 21%                | 23%                | -0.05 | 21%                | 23%               | -0.02 |
| White                        | 69%                | 57%                | 0.26  | 68%                | 67%               | 0.02  |
| Hispanic                     | 5%                 | 13%                | -0.26 | 6%                 | 6%                | -0.02 |
| Other races                  | 2%                 | 3%                 | -0.08 | 2%                 | 2%                | 0.02  |
| Primary Insurance            |                    |                    |       |                    |                   |       |
| Medicare                     | 36%                | 45%                | -0.19 | 37%                | 38%               | -0.02 |
| Medicaid                     | 4%                 | 5%                 | -0.05 | 4%                 | 4%                | 0.00  |
| Other                        | 60%                | 50%                | 0.21  | 60%                | 59%               | 0.02  |
| ESRD reason                  |                    |                    |       |                    |                   |       |
| DM                           | 36%                | 40%                | -0.09 | 37%                | 38%               | -0.02 |
| HTN                          | 22%                | 27%                | -0.13 | 22%                | 22%               | 0.01  |
| GN                           | 18%                | 15%                | 0.07  | 18%                | 17%               | 0.02  |
| PCKD                         | 6%                 | 4%                 | 0.12  | 6%                 | 5%                | 0.02  |
| Other                        | 18%                | 13%                | 0.13  | 18%                | 18%               | -0.01 |
| Comorbidities                |                    |                    |       |                    |                   |       |
| Diabetes                     | 62%                | 63%                | -0.03 | 62%                | 63%               | -0.02 |
| Hypertension                 | 71%                | 52%                | 0.38  | 70%                | 71%               | -0.02 |
| ASHD                         | 27%                | 17%                | 0.24  | 26%                | 26%               | -0.01 |
| CHF                          | 50%                | 20%                | 0.66  | 48%                | 50%               | -0.04 |
| Cerebrovascular              | 1%                 | 1%                 | 0.02  | 1%                 | 2%                | -0.02 |
| Other cardiovascular disease | 22%                | 15%                | 0.20  | 22%                | 24%               | -0.05 |
| COPD                         | 6%                 | 3%                 | 0.14  | 6%                 | 8%                | -0.07 |
| Dyslipidemia                 | 43%                | 45%                | -0.04 | 43%                | 51%               | -0.15 |
| Liver disease                | 2%                 | 1%                 | 0.08  | 2%                 | 3%                | -0.06 |
| Alcohol abuse                | 0%                 | 0%                 | 0.03  | 0%                 | 0%                | -0.03 |
| History of cancer            | 4%                 | 2%                 | 0.15  | 4%                 | 3%                | 0.08  |
| Prior transplant             | 6%                 | 2%                 | 0.17  | 6%                 | 4%                | 0.10  |
| Start body mass index        | 28 (24-34)         | 27 (23-32)         | -0.12 | 28 (24-33)         | 28 (24-34)        | -0.01 |
| Laboratory results           |                    |                    |       |                    |                   |       |
| Start creatinine             | 7.3 ± 3.0          | 6.7 ± 3.1          | 0.19  | 7.2 ± 3.0          | 7.8 ± 3.7         | -0.18 |
| Start albumin                | 3.92 ± 0.46        | 3.69 ± 0.46        | 0.50  | 3.9 ± 0.5          | 3.8 ± 0.4         | 0.35  |

ESRD, end-stage renal disease; DM, diabetes mellitus; HTN, hypertension; GN, glomerulonephritis; PCKD, polycystic kidney disease; ASHD, atherosclerotic heart disease; CHF, congestive heart failure; COPD, chronic obstructive pulmonary disease; HHD, home hemodialysis; PD, peritoneal dialysis; SD, standard deviation.

**Supplementary Table S3.** Hazard ratio comparison of the overall mortality of home hemodialysis and peritoneal dialysis patients in intention-to-treat and on-treatment analyses according to dialysis duration in the unmatched cohort ( $n = 18,507$ )

|                         | Total                   |                   | <3 months        |                   | 3-12 months             |                   | >12 months              |                   |
|-------------------------|-------------------------|-------------------|------------------|-------------------|-------------------------|-------------------|-------------------------|-------------------|
|                         | HR (95% CI)             | <i>p</i><br>value | HR (95% CI)      | <i>p</i><br>value | HR (95% CI)             | <i>p</i><br>value | HR (95% CI)             | <i>p</i><br>value |
| ITT                     |                         |                   |                  |                   |                         |                   |                         |                   |
| Unadjusted              | 1.11 (0.97-1.26)        | 0.132             | 1.14 (0.86-1.52) | 0.353             | <b>1.24 (1.04-1.49)</b> | <b>0.018</b>      | <b>1.79 (1.35-2.37)</b> | <b>0.000</b>      |
| Casemix adjusted        | <b>1.25 (1.08-1.43)</b> | <b>0.002</b>      | 0.95 (0.71-1.28) | 0.747             | <b>1.29 (1.07-1.56)</b> | <b>0.008</b>      | <b>1.62 (1.21-2.17)</b> | <b>0.001</b>      |
| Casemix + MICS adjusted | 1.04 (0.91-1.20)        | 0.538             | 0.90 (0.67-1.21) | 0.489             | 1.16 (0.95-1.40)        | 0.136             | 1.12 (0.82-1.53)        | 0.479             |
| onTx                    |                         |                   |                  |                   |                         |                   |                         |                   |
| Unadjusted              | 1.09 (0.93-1.26)        | 0.284             | 1.19 (0.84-1.69) | 0.339             | <b>1.25 (1.02-1.54)</b> | <b>0.033</b>      | <b>1.74 (1.27-2.37)</b> | <b>0.001</b>      |
| Casemix adjusted        | 1.17 (0.99-1.38)        | 0.058             | 0.88 (0.61-1.27) | 0.513             | 1.19 (0.95-1.48)        | 0.129             | <b>1.48 (1.64-2.06)</b> | <b>0.002</b>      |
| Casemix + MICS adjusted | 0.98 (0.83-1.16)        | 0.835             | 0.87 (0.60-1.26) | 0.445             | 1.06 (0.85-1.32)        | 0.613             | 0.98 (0.69-1.40)        | 0.914             |

Reference groups are home hemodialysis patients.

ITT, intention-to-treat; MICS, malnutrition-inflammation-cachexia syndrome; onTx, on-treatment analysis; HR, hazard ratio from Cox proportional hazards regression; CI, confidence interval.

## Supplementary Figure Legends

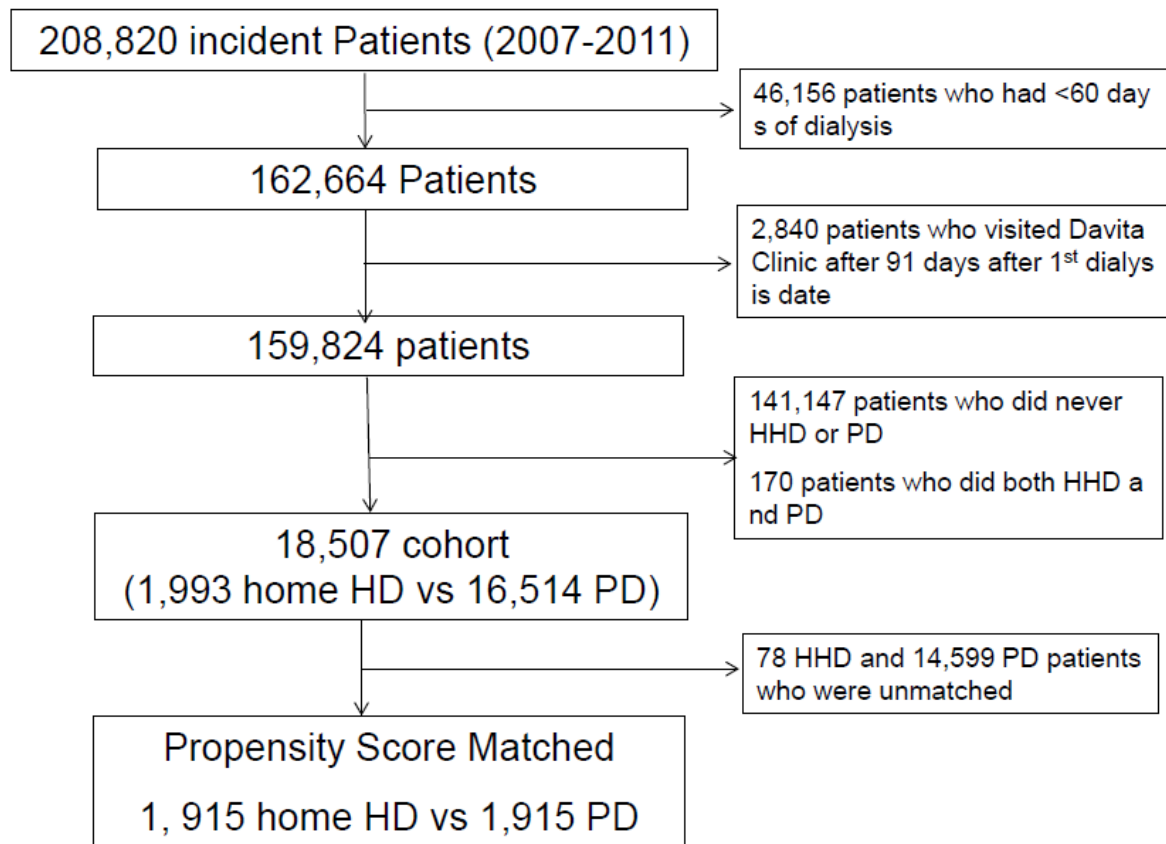

**Supplementary Figure S1.** Construction of the study cohort. While peritoneal dialysis (PD) has been established as a first modality, home hemodialysis (HHD) is still undergoing a transition as a second modality in patients with end-stage renal disease (ESRD). Little is known about how mortality associated with HHD versus PD differs according to the duration of dialysis at the time of transition. Authors compared clinical outcomes of 1,993 HHD and 16,514 PD patients in national incident ESRD cohort. Whereas there was no meaningful survival difference in the first 12 months between PD and HHD, patients who transitioned to PD after 12 months of dialysis had 83% higher risk for mortality than their HHD counterparts.

These finding may have relevance to patient communication and policy development of dialysis modality.
